# Supplementary material for: High glucose causes developmental abnormalities in neuroepithelial cysts with actin and HK1 distribution changes
Source: Front Cell Dev Biol. 2023 Jan 6;10:1021284. doi: 10.3389/fcell.2022.1021284 (PMC9852901; doi:10.3389/fcell.2022.1021284)
Supplement: Supplementary file 1 [file Table1.DOCX]

**Table S1 Antibodies used in our experiments**

| **Category** | **Antigen** | **Dilution ratio** | **Company & Catalog#** |
| --- | --- | --- | --- |
| **Primary antibody** | NCAD | 1:200 | abcam, ab19348 |
| pH3 | 1:500 | abcam, ab32388 |
| cleaved caspase3 | 1:400 | Cell Signaling Technology,9661 |
| PAX6 | 1:100 | proteintech, 12323-1-AP |
| pMLC | 1:100 | Cell Signaling Technology,3671 |
| pCFN | 1:50 | Cell Signaling Technology,3313 |
| GLUT2 | 1:100 | proteintech, 20436-1-AP |
| HK1 | 1:400 | proteintech, 19662-1-AP |
| PFKM | 1:100 | proteintech, 55028-1-AP |
| PKM2 | 1:100 | proteintech, 15822-1-AP |
| LDHA | 1:50 | proteintech, 19987-1-AP |
| LDHB | 1:400 | proteintech, 14824-1-AP |
| G6PD | 1:400 | proteintech, 25413-1-AP |
| TOM20 | 1:500 | proteintech, 66777-1-Ig |
| **Secondary antibody** | Goat anti-Rabbit IgG (H+L) Cross-Adsorbed Secondary Antibody, Cyanine5 | 1:500 | Invitrogen, A10523 |
| Goat Anti-Rabbit IgG H&L (Alexa Fluor® 488) preadsorbed | 1:500 | abcam, ab150081 |
| Goat Anti-Mouse IgG H&L (Alexa Fluor® 647) | 1:500 | abcam, ab150115 |
| Goat Anti-Mouse IgG H&L (Alexa Fluor® 488) preadsorbed | 1:500 | abcam, ab150117 |
| Rhodamine Phalloidin | 1:500 | Invitrogen, R415 |
| DAPI | 1:1000 | Beyotime, C1002 |
